# Supplementary material for: Clobetasol and Halcinonide Act as Smoothened Agonists to Promote Myelin Gene Expression and RxRγ Receptor Activation
Source: PLOS journal article supplement (doi:10.1371/journal.pone.0144550), 2015-12-10
Supplement: S1 (10.1371/journal.pone.0144550.s001) [file journal.pone.0144550.s001]

## S1 Figure. Glucocorticoids stimulate MBP protein expression in Oli-neuM cells

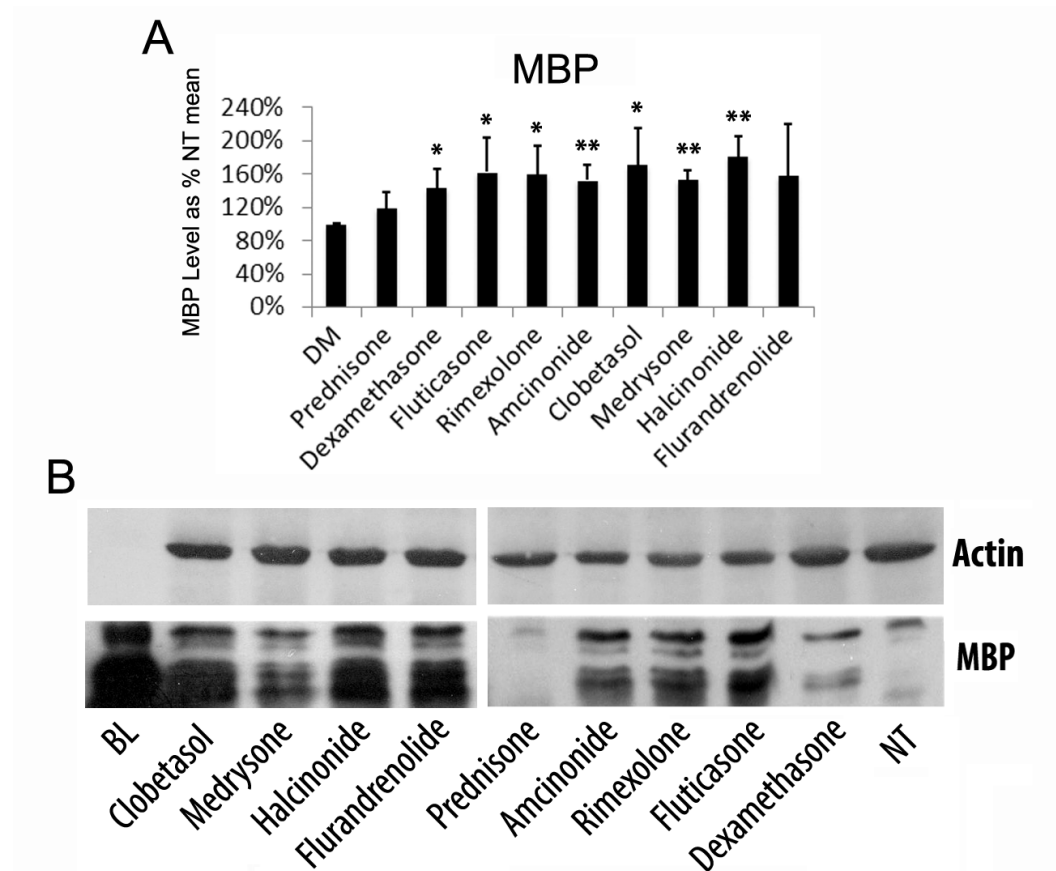

**S1 Figure legend.** Glucocorticoids stimulate MBP protein expression in Oli-neuM cells. (A) Graph indicating the relative MBP band intensities normalized with that of actin and expressed as % of variation compared to NT Oli-neuM cells were treated with 10  $\mu$ M GCs for 48h. Data are presented as the mean  $\pm$  SD (n = 5) and statistical significance was analysed by a two-tailed Student's t test with: Dexamethasone P = 0.0257, Fluticasone P = 0.05, Rimexolone P = 0.0408, Amcinonide P = 0.007, Clobetasol P = 0.05, Medrysone P = 0.001 and Halcinonide P = 0.004. (B) Representative immunoblot of the data in (A) (BL = Brain Lysate). \* $p \leq 0.05$ ; \*\* $p \leq 0.01$  No asterisk means  $p > 0.05$ .
