# Supplementary material for: Clobetasol and Halcinonide Act as Smoothened Agonists to Promote Myelin Gene Expression and RxRγ Receptor Activation
Source: PLOS journal article supplement (doi:10.1371/journal.pone.0144550), 2015-12-10
Supplement: S4 (10.1371/journal.pone.0144550.s004) [file journal.pone.0144550.s004]

**S4 Figure. Fyn inhibitor PP2 does not influence MBP protein expression**

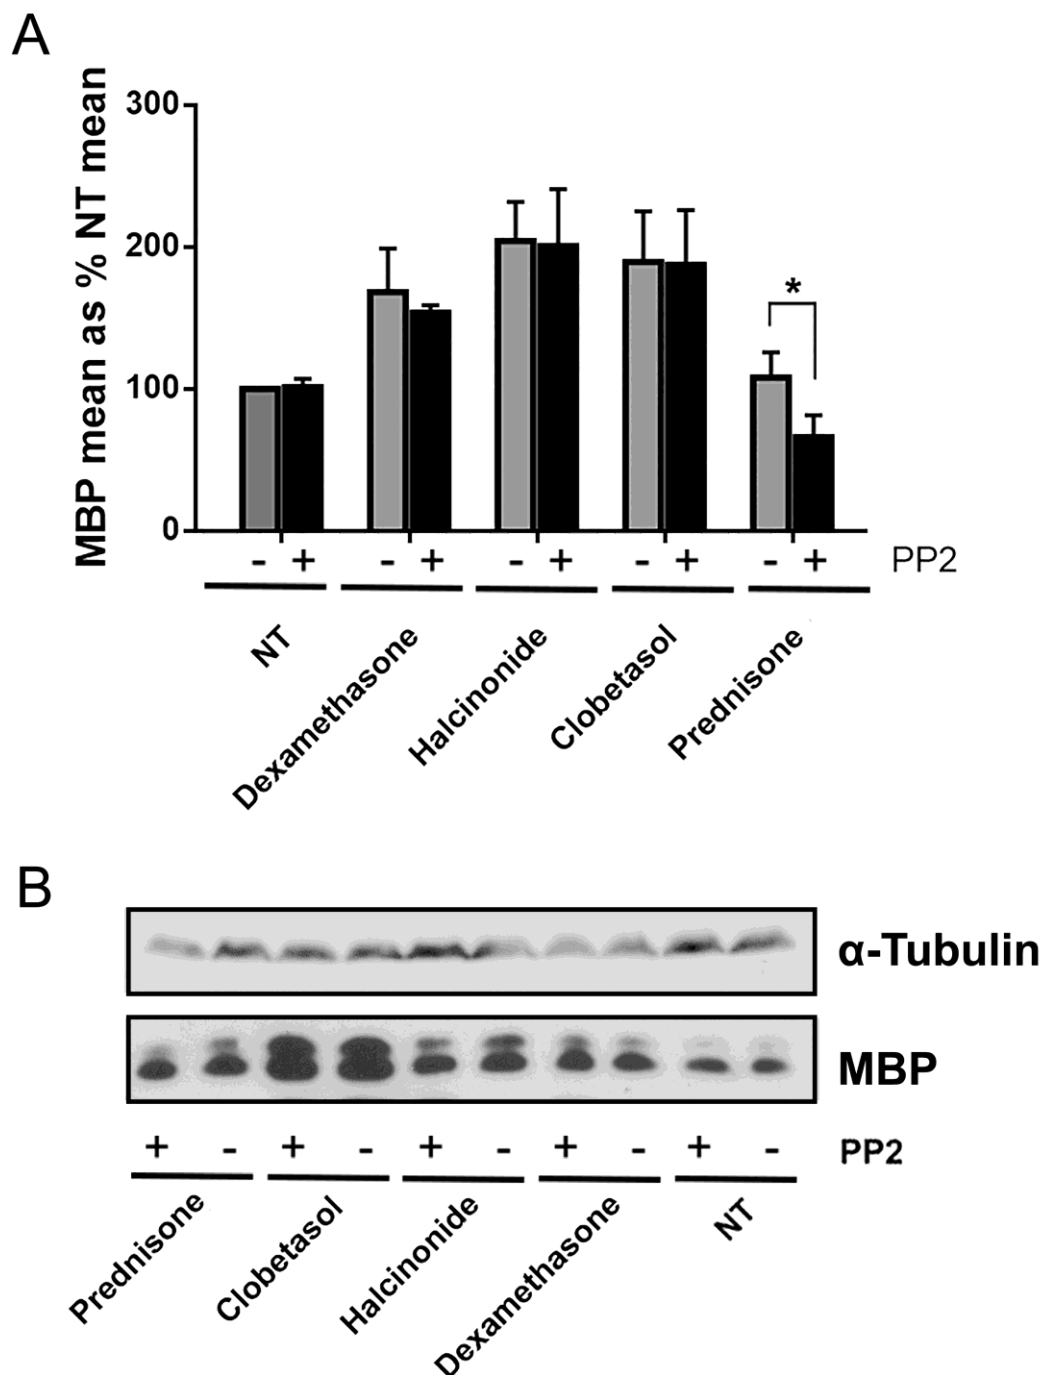

**S4 Figure Legend.** Fyn inhibitor PP2 does not influence MBP protein expression. (A) Graph indicates the MBP band intensities normalized with the  $\alpha$ -Tubulin and express as % of variation compared to NT. (B) Representative immunoblot of Oli-neuM cells treated with 10  $\mu$ M Glucocorticoids and 10 $\mu$ M PP2 for 48h. Data are presented as the mean  $\pm$  SD (n = 3) and statistical significance was analysed by a Student's t test with \*P = 0.03262.
